# Supplementary material for: Controlled protein adsorption and delivery of thermosensitive poly(N-isopropylacrylamide) nanogels
Source: Royal Society of Chemistry journal article supplement (doi:10.1039/c7tb01824j), 2017-01-01
Supplement: c7tb01824j1.pdf [file c7tb01824j1.pdf]

## Supplementary Information

### **Controlled protein adsorption and delivery of thermosensitive poly(*N*-isopropylacrylamide) nanogels**

Yuzheng Wu<sup>a</sup>, Haifeng Li<sup>a</sup>, Zhouquan Rao<sup>a</sup>, Huaqiang Li<sup>a</sup>, Yan Wu<sup>a</sup>, Jianhao Zhao<sup>a,b,\*</sup>, Jianhua Rong<sup>a,b,\*</sup>

<sup>a</sup>Department of Materials Science and Engineering, College of Chemistry and Materials Science, Jinan University, Guangzhou 510632, China

<sup>b</sup>Engineering Research Center of Artificial Organs and Materials, Ministry of Education, Guangzhou 510632, China

\*Corresponding author at: Department of Materials Science and Engineering, College of Chemistry and Materials Science, Jinan University, Guangzhou 510632, China.

Correspondence to: Jianhao Zhao (E-mail: [jhzhao@jnu.edu.cn](mailto:jhzhao@jnu.edu.cn))

Tel./fax: +86 20 85223271

Correspondence to: Jianhua Rong (E-mail: [trong@jnu.edu.cn](mailto:trong@jnu.edu.cn))

Tel./fax: +86 20 85223271

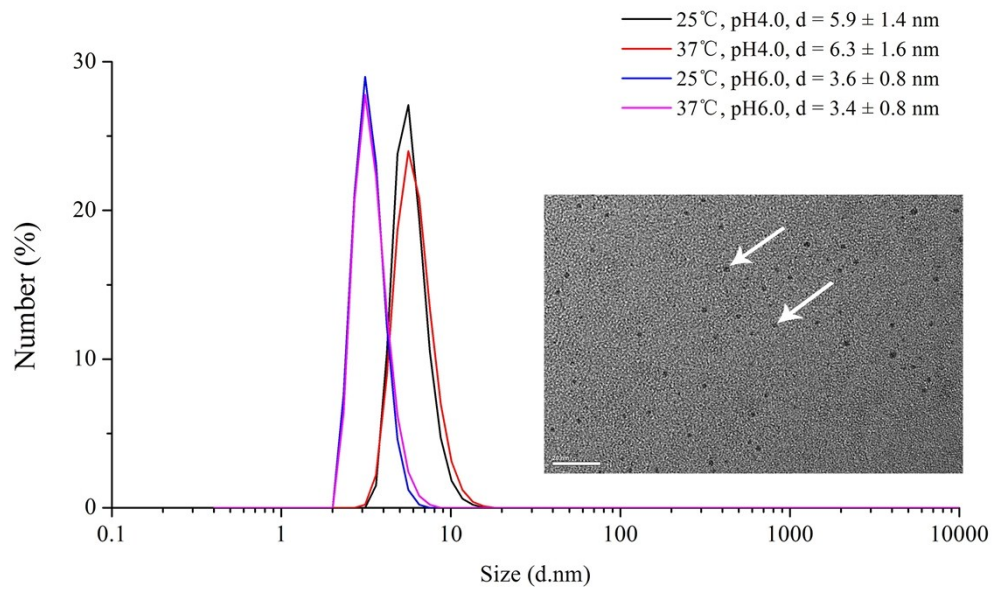

S1 DLS patterns of BSA in deionized water at different temperatures and pH values, inset: TEM image of BSA at 25 °C and pH6.0, arrows: BSA

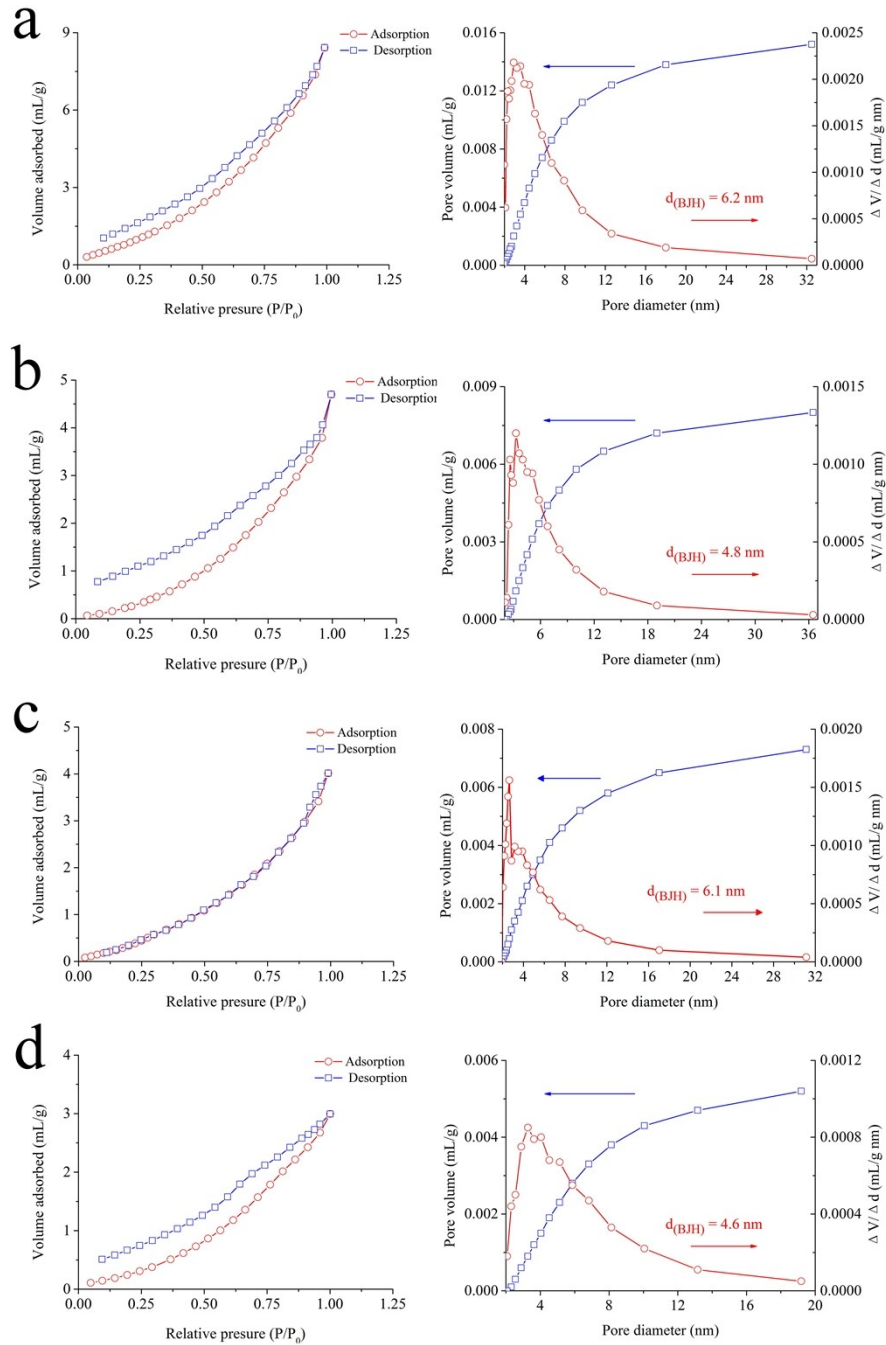

S2 Nitrogen adsorption-desorption isotherm curves and pore size distribution of dry PNIPAM nanogels obtained at different temperatures and pH values by using Barrett-Joyner-Halenda (BJH) model. (a) 25 °C and pH4.0, (b) 37 °C and pH4.0, (c) 25 °C and pH6.0, and (d) 37 °C and pH6.0
